# Supplementary material for: Distribution of Zooplankton Functional Groups in the Chaohu Lake Basin, China
Source: MDPI journal article supplement (doi:10.3390/w14132106), 2022-07-01
Supplement: s1 [file s1]

Archive with 6 entries (6 files):
- Figure S1.pdf
- Table S1. Functional groups of zooplankton.xlsx
- Table S2. Seasonal and spatial variations of physicochemical parameters.xlsx
- Table S3. Species compositions of zooplankton detected in this study.xlsx
- Table S4. The composition of zooplankton functional groups in Chaohu Lake Basin.xlsx
- Table_S5.xlsx
