# Supplementary material for: Distribution of Zooplankton Functional Groups in the Chaohu Lake Basin, China
Source: MDPI journal article supplement (doi:10.3390/w14132106), 2022-07-01
Supplement: s1 [file s1 › Table S1. Functional groups of zooplankton.xlsx]

## Sheet: Sheet1
Figure S1. Functional groups of zooplankton
Functional group	Size (mm)	Feeding habits
Protozoan photosynthetic autotrophs (PP)		Flagellates containing pigments for photosynthesis and groups containing symbiotic green algae
Protozoan algivores (PA)		Feeding algae
Protozoan bacterivores (PB)		Feeding bacteria and debris
Protozoan fungivores (PF)		Feeding on fungal hyphae
Protozoan saprotrophs (PS)		Feeding on macromolecular organic matter dissolved in water
Protozoan raptors (PR)		Feeding on protozoa such as flagellates, sarcopods and ciliates or small rotifers
Rotifers particle sedimentators (RF)		Feeding on bacteria, algae and debris with the particle size less than 10 µm
Rotifers small graspers (RSG)		Feeding on food particles with the size of 20 - 30 µm, mainly including golden algae, cryptoalgae and other algae
Rotifers large graspers (RLG)		Feeding on larger food particles ≥ 50 µm, mainly including flagellates and diatoms, and occasionally eat animal food
Rotifers suckers (RS)		Feeding on a wide range of algal cells, including some colony forms
Rotifers predators (RP)		Feeding on protozoa, rotifers and small crustaceans
Small copepods and claocera filter feeders (SCF)	＜0.7	Filter-feeding on bacteria, algae, organic matter and protozoa
Small copepods and claocera carnivora (SCC)	＜0.7	Predators, feeding on rotifers, cladocerans, Diptera insects (chironomid larvae) and Oligochaeta
Small copepods and claocera mixture (SCM)	＜0.7	Feeding on algae, bacteria, protozoa, rotifers and animal carcasses
Middle copepods and claocera filter feeders (MCF)	0.7-1.5	Filter-feeding on bacteria, algae, organic matter and protozoa
Middle copepods and claocera carnivora (MCC)	0.7-1.5	Predators, feeding on rotifers, cladocerans, Diptera insects (chironomid larvae) and Oligochaeta
Middle copepods and claocera mixture (MCM)	0.7-1.5	Feeding on algae, bacteria, protozoa, rotifers and animal carcasses
Large copepods and claocera filter feeders (LCF)	＞1.5	Filter-feeding on bacteria, algae, organic matter and protozoa
Large copepods and claocera carnivora (LCC)	＞1.5	Predators, feeding on rotifers, cladocerans, Diptera insects (chironomid larvae) and Oligochaeta
Large copepods and claocera mixture (LCM)	＞1.5	Feeding on algae, bacteria, protozoa, rotifers and animal carcasses
