# Supplementary material for: Distribution of Zooplankton Functional Groups in the Chaohu Lake Basin, China
Source: MDPI journal article supplement (doi:10.3390/w14132106), 2022-07-01
Supplement: s1 [file s1 › Table S2. Seasonal and spatial variations of physicochemical parameters.xlsx]

## Sheet: Sheet1
Table S2. Spatiotemporal variations of physicochemical parameters. Data were expressed as mean ±SD.
	Spring	Summer	Autumn	Winter	P	ECL	WCL	NFR	PR	HBR	BSSR	ZR	YXR	ZGR	P
WT (°C)	21.4±1.9c	27.9±1.3d	20.6±1.0b	8.3±1.1a	<0.0001	20.0±7.9b	20.3±8.2b	20.0±6.7a	20.1±6.8a	18.7±6.9ab	19.5±7.9ab	19.0±7.3ab	19.3±7.4ab	19.2±8.0ab	<0.0001
DO (mg/L)	9.75±2.12b	8.15±0.52a	7.92±1.81a	10.29±2.84b	<0.0001	10.25±2.35b	10.32±2.02b	7.95±2.15a	8.42±3.91a	8.96±1.44ab	8.51±2.09ab	9.17±2.01ab	8.70±1.36ab	8.57±1.36ab	<0.0001
pH	8.31±0.40b	7.76±0.52a	8.38±0.59b	7.84±0.32a	<0.0001	8.37±0.31bc	8.61±0.45c	7.88±0.42a	7.93±0.69a	7.81±0.34a	7.73±0.41a	8.06±0.76ab	8.10±0.40ab	8.05±0.41ab	<0.0001
Cond (uS/cm)	417±153b	274±119a	365±162b	432±146b	<0.0001	342±49bc	356±83bc	499±224d	589±156e	176±75a	286±77b	354±125bc	397±67c	384±71c	<0.0001
TN (mg/L)	2.29±1.58a	2.59±1.43b	2.52±1.80ab	3.18±2.12a	0.0038	1.62±0.35a	2.19±0.69a	5.12±2.07b	5.66±1.52b	1.50±0.73a	2.22±0.76a	2.25±0.74a	1.91±0.92a	1.76±0.48a	<0.0001
TP (mg/L)	0.09±0.05a	0.14±0.12b	0.12±0.07ab	0.09±0.07a	0.00119	0.08±0.02a	0.11±0.04a	0.18±0.12b	0.22±0.15b	0.05±0.02a	0.10±0.06a	0.09±0.05a	0.08±0.02a	0.09±0.04a	<0.0001
PO4-P (mg/L)	0.03±0.03a	0.05±0.06b	0.03±0.03a	0.02±0.04a	0.00401	0.01±0.01a	0.03±0.02a	0.08±0.09b	0.06±0.04b	0.02±0.02a	0.03±0.03a	0.01±0.01a	0.03±0.03a	0.03±0.03a	<0.0001
NH4-N (mg/L)	0.42±0.25a	0.60±0.75ab	0.78±1.02ab	1.09±1.41b	0.00634	0.31±0.06a	0.44±0.19a	1.90±2.07b	1.54±1.09b	0.36±0.19a	0.66±0.45a	0.54±0.29a	0.45±0.40a	0.43±0.21a	<0.0001
NO3-N (mg/L)	0.71±1.17a	0.96±0.34ab	0.71±1.19a	1.30±1.15b	0.00021	0.34±0.37a	0.59±0.50a	2.47±1.50b	2.23±1.02b	0.55±0.48a	0.56±0.49a	0.56±0.60a	0.65±0.57a	0.45±0.27a	<0.0001
NO2-N (mg/L)	0.12±0.17ab	0.13±0.15b	0.07±0.08a	0.06±0.09a	0.0066	0.02±0.02a	0.04±0.03ab	0.23±0.21c	0.24±0.11c	0.05±0.05ab	0.04±0.04ab	0.12±0.15b	0.06±0.06ab	0.09±0.14ab	<0.0001
CODMn (mg/L)	5.10±0.91a	5.93±3.89a	5.28±1.30a	5.06±1.17a	0.22895	5.20±0.81ab	5.61±0.94b	5.52±1.54b	7.34±6.20c	3.81±0.89a	5.75±0.41b	5.27±0.80ab	4.54±0.78ab	5.73±0.92b	0.00148
BOD5 (mg/L)	2.71±1.77a	2.57±1.47a	2.75±1.55a	2.80±2.05a	0.88828	2.04±1.07abc	2.46±0.82abc	4.39±2.48d	4.67±1.98d	1.35±0.73a	2.63±1.21bc	3.12±1.46c	1.83±0.65ab	2.22±0.92abc	<0.0001
Chl.a (µg/L)	8.66±7.36a	49.86±194.49a	39.02±40.75a	16.63±17.1a	0.2609	34.00±29.39ab	39.49±42.56ab	15.83±13.97a	106.95±321.67b	5.94±4.97a	16.05±13.97a	29.59±43.36ab	10.44±7.56a	10.57±4.40a	0.2192
Trans (cm)	71.8±61.5ab	54.9±39.8a	61.7±38.8ab	85.2±69.6b	0.00387	36.6±9.3ab	33.4±6.5a	64.2±37.2b	49.9±24.7ab	176.8±87.9c	58.2±17.3ab	61.4±19.6ab	60.7±13.2ab	66.5±19.5b	<0.0001
