# Supplementary material for: Distribution of Zooplankton Functional Groups in the Chaohu Lake Basin, China
Source: MDPI journal article supplement (doi:10.3390/w14132106), 2022-07-01
Supplement: s1 [file s1 › Table S4. The composition of zooplankton functional groups in Chaohu Lake Basin.xlsx]

## Sheet: Sheet1
Table S4. Compositions of zooplankton functional groups in Chaohu Lake Basin.
	Species	Functional group	spring	summer	autumn	winter	Nanfei-Dianbu River	Pai River	Hangbu-Fengle River	Baishishan River	Zhao River	Yuxi River	Zhegao River	West Chaolu Lake	East Chaohu Lake
Protozoan	Arcella sp.1	PA			+			+
	Arcella sp.2	PA			+						+
	Arcella hemiisphaerica	PA		+			+
	Centropyxis aculeata	PA		+		+	+
	Cyclopyxis deflandrei	PA				+	+
	Cucurbitella mespiliformis	PA			+								+
	Difflugia acutissima	PA		+			+
	Difflugia elegans	PA			+		+					+
	Difflugia difficilis	PA	+	+		+	+						+
	Difflugia glans	PA	+	+	+	+	+			+	+		+		+
	Difflugia globulosa	PA		+	+					+	+	+	+	+	+
	Difflugia gramen	PA	+	+	+				+	+	+	+	+	+	+
	Difflugia gramen globulosa	PA	+	+	+	+		+		+	+	+	+	+	+
	Difflugia lithophila	PA			+									+	+
	Difflugia lucid	PA		+	+					+	+
	Difflugia mulanensis	PA		+	+			+		+	+			+
	Difflugia sarissa	PA			+					+
	Difflugia schuurmani	PA			+		+
	Difflugia exigucollum	PA	+							+
	Difflugia sp.1	PA			+						+
	Difflugia sp.2	PA			+			+
	Difflugia sp.3	PA			+					+
	Difflugia sp.4	PA				+								+
	Difflugia sp.5	PA		+										+
	Difflugia sp.6	PA		+			+
	Difflugia sp.7	PA		+							+
	Difflugia tuberspinifera	PA		+					+		+
	Difflugia urceolata	PA		+	+			+			+
	Nebla barbata	PA			+								+
	Nebela tincta	PA	+											+
	Nassula sp.	PA			+	+	+							+	+
	Cyclidium sp.1	PB			+					+
	Cyclidium sp.2	PB			+								+
	Condylostoma sp.	PB				+	+
	Enchelys mutans	PB			+			+
	Enchelys sp.	PB			+		+
	Enchelydium sp.	PB			+		+
	Epistylis sp.	PB		+	+				+					+	+
	Glaucoma sp.	PB	+						+
	Halterria gradinella	PB			+		+
	Paramecium caudatum	PB		+	+		+	+		+
	Tetrahymena pyrifomis	PB		+	+		+	+	+				+
	Urocentrum terbo	PB			+							+
	Uronema nigrican	PB			+		+
	Vorticella sp.	PB		+		+	+	+	+			+			+
	Zoothamnium sp.	PB		+				+					+
	Leprotintinnus fluviatile	PA/PB		+	+		+	+		+	+	+	+		+
	Plagiocampa sp.	PA/PB			+				+
	Tachysoma pellionella	PA/PB				+	+
	Tintinnidium fluviatile	PA/PB	+	+	+	+		+	+	+	+	+	+		+
	Tintinnidium entzii	PA/PB	+	+	+	+	+	+	+	+	+	+	+
	Tintinnidium pusillum	PA/PB			+					+			+
	Tintinnidium sp.	PA/PB			+					+
	Tintinnopsis conus	PA/PB	+	+	+	+	+		+	+	+	+	+	+	+
	Tintinnopsis kiangsuensis	PA/PB	+	+	+	+	+	+	+	+	+	+	+	+	+
	Tintinnopsis leidyi	PA/PB	+	+	+	+	+		+		+	+	+	+	+
	Tintinnopsis longus	PA/PB				+				+
	Tintinnopsis niei	PA/PB			+				+	+	+	+		+	+
	Tintinnopsis potiformis	PA/PB		+	+	+	+		+	+	+		+	+	+
	Tintinnopsis wangi	PA/PB	+	+	+	+	+	+	+	+	+	+	+	+	+
	Tintinnopsis tutuformis	PA/PB	+		+		+			+
	Tintinnopsis sinensis	PA/PB				+			+		+	+		+	+
	Tintinnopsis sinensis var. fulva	PA/PB				+				+	+
	Tintinnopsis sp.1	PA/PB		+	+				+	+	+		+	+	+
	Tintinnopsis sp.2	PA/PB		+						+			+
	Tintinnopsis sp.3	PA/PB		+						+
	Tintinnopsis subpistillum	PA/PB	+				+
	Tintinnopsis wusihensis	PA/PB				+		+		+				+	+
	Askenasia volvox	PB			+							+
	Strobilidium gyrans	PF	+	+	+	+	+	+	+	+	+	+	+	+	+
	Acineta sp.	PR			+		+
	Didinium nasutum	PR		+					+
	Didinium sp.	PR			+				+
	Euplotes sp.	PR				+		+
	Hemiophrys meleagris	PR				+	+	+
	Lacrymaria olor	PR	+	+	+	+	+	+		+	+	+	+	+	+
	Litonotus obtusus	PR				+		+
	Litonotus sp.1	PR			+			+
	Litonotus sp.2	PR		+					+
	Stentor sp.	PA/PR				+									+
Rotifer	Anuraeopsis fissa	RF	+	+	+		+	+	+	+	+	+	+	+	+
	Anuraeopsis navicula	RF		+	+		+	+		+	+		+	+	+
	Anuraeopsis sp.	RF		+	+		+	+		+	+	+	+	+
	Bdelloidea	RF			+					+
	Bdelloidea	RF	+					+
	Brachionus angularis	RF	+	+	+	+	+	+	+	+	+	+	+	+	+
	Brachionus budapestiensis	RF		+	+		+	+			+		+		+
	Brachionus calyciflorus	RF	+	+	+	+	+	+	+	+	+		+	+	+
	Brachionus diversicornis	RF				+									+
	Brachionus falcatus	RF		+						+	+
	Brachionus forficula	RF		+	+			+	+	+	+	+	+	+
	Brachionus urceus	RF				+	+
	Brachionus caudatus	RF	+	+			+	+
	Brachionus quadridentatus	RF	+	+			+						+
	Conochilus dossuarius	RF	+	+	+					+	+	+	+	+
	Conochilus unicornis	RF	+	+	+	+		+	+	+	+	+	+	+	+
	Collotheca ambigua	RF	+	+	+		+		+	+	+			+
	Colurella uncinata	RF		+								+
	Colurella sp.	RF	+											+
	Euchlanis dilatata	RF			+						+
	Euchlanis sp.1	RF			+										+
	Euchlanis sp.2	RF				+					+
	Euchlanis sp.3	RF		+							+
	Filinia longiseta	RF	+	+	+	+	+	+	+	+	+	+	+	+	+
	Filinia brachiata	RF	+				+
	Filinia maio	RF		+										+
	Filinia passa	RF		+			+
	Gastropus hyplopus	RF	+		+						+	+		+	+
	Hexarthra mira	RF		+	+					+		+	+	+	+
	Keratella cochlearis	RF	+	+	+	+	+	+	+	+	+	+		+	+
	Kerateua quadrata	RF				+	+								+
	KeratelIa valaa	RF	+	+	+	+	+	+	+	+	+	+	+	+	+
	Lecane hornemanni	RF		+	+		+				+			+
	Lecane nana	RF			+									+
	Lecane nodosa	RF			+									+
	Lepadella patella	RF		+	+				+	+	+	+	+
	Lepadella sp.1	RF			+		+
	Lepadella sp.2	RF			+			+
	Monostyla bulla	RF			+			+		+
	Monostyla closterocerca	RF			+						+
	Monostyla cornula	RF			+						+			+	+
	Monostyla crenata	RF			+						+
	Monostyla lunaris	RF			+					+	+
	Monostyla pyriformis	RF		+	+						+	+		+
	Monostyla unguitata	RF			+							+
	Monostyla furcata	RF		+								+
	Monostyla sp.1	RF			+					+
	Monostyla sp.2	RF			+						+
	Mytilina compressa	RF		+								+
	Hexarthra mira	RF		+				+		+	+	+
	Philodina sp.	RF		+							+
	Philodina inopinata	RF		+			+
	Platyias puadricornis	RF		+						+			+
	Pompholyx sulcata	RF		+	+		+			+	+		+	+	+
	Testudupinella patina	RF	+	+		+	+		+			+	+	+
	Trichotria truncata	RF		+			+
	Trichotria tetractis	RF		+	+		+				+
	Asplachna priodonta	RP	+	+	+	+	+	+	+	+	+	+	+		+
	Asplachna girodi	RP	+							+		+
	Asplachna sp.1	RP	+		+		+	+					+
	Asplachna sp.2	RP			+				+
	Asplachna sp.3	RP			+					+
	Asplachna sp.4	RP			+								+
	Asplachna sp.5	RP				+				+
	Asplachna sp.6	RP		+									+
	Asplanchnopus multiceps	RP		+				+
	Cephalodella exigna	RP			+		+
	Cephalodella sp.1	RP				+	+
	Cephalodella sp.2	RP		+				+
	Dicranophorus sp.1	RP		+	+		+						+
	Dicranophorus sp.2	RP		+					+
	Proalides sp.	RP				+	+	+
	Polyarthra dolichoptera	RSG		+							+	+
	Polyarthra minor	RSG	+		+	+	+	+	+	+	+		+		+
	Polyarthra trigla	RSG	+	+	+	+	+	+	+	+	+	+	+	+	+
	Synchaeta stylata	RLG	+	+	+	+	+	+	+	+	+		+	+
	Synchaeta pectindta	RLG	+				+		+			+
	Synchaeta sp.	RLG		+	+	+		+	+	+	+	+	+		+
	Trichocerca bicristata	RS			+			+
	Trichocerca bidens	RS		+	+				+		+			+
	Trichocerca cavia	RS			+									+
	Trichocerca cylindrica	RS	+	+	+	+			+	+	+	+	+	+	+
	Trichocerca lophoessa	RS		+	+			+	+		+		+	+
	Trichocerca elongata	RS	+									+
	Trichocerca gracilis	RS			+		+
	Trichocerca macera	RS		+	+		+	+	+	+	+			+	+
	Trichocerca montana	RS			+										+
	Trichocerca myersi	RS		+	+						+				+
	Trichocerca porcsllus	RS			+									+
	Trichocerca dixon-nuttalli	RS		+					+
	Trichocerca pusilla	RS		+	+		+	+	+	+	+	+	+		+
	Trichocerca rattus	RS		+	+			+	+	+	+	+	+	+	+
	Trichocerca rousseleti	RS	+	+					+		+
	Trichocerca similis	RS	+	+	+	+	+	+	+	+	+		+
	Trichocerca insignis	RS		+									+
	Trichocerca sp.1	RS			+		+
	Trichocerca sp.2	RS			+			+
	Trichocerca sp.3	RS			+								+
	Trichocerca sp.4	RS			+								+
	Trichocerca sp.6	RS		+									+
	Trichocerca sp.7	RS		+							+
cladocerans and copepods	Alona affinis	SCF				+	+	+
	Alona sp.	SCF				+							+
	Alona rectangula	SCF	+	+	+	+			+				+	+	+
	Alonella excisa	SCF			+	+	+	+
	Bosmina fatalis	SCF	+	+	+	+								+	+
	Bosmina longirostris	SCF	+	+	+	+	+	+	+	+	+	+	+	+	+
	Bosminopsis deitersi	SCF	+			+									+
	Ceriodaphnia cornuta	SCF	+	+	+	+	+	+	+	+	+	+	+	+	+
	Chydorus sphaericus	SCF	+	+	+	+								+	+
	Chydorus ovalis	SCF	+		+	+	+	+	+	+	+	+	+
	Graptoleberis testudinaria	SCF	+				+
	Moina micrura.	SCF	+	+	+	+	+	+	+	+	+	+	+	+	+
	Pleuroxus laeuis	SCF			+				+
	Pleuroxus hamulatus	SCF	+			+	+	+			+		+
	Copepodid	SCF	+	+	+	+	+	+	+	+	+	+	+	+	+
	Copepod nauplii	SCF	+	+	+	+	+	+	+	+	+	+	+	+	+
	Limnoithona sinensis	SCF	+	+	+	+	+				+	+	+	+	+
	Acanthocyclops vernalis	MCC			+								+
	Mesocyclops leuckarti	MCC	+	+	+	+	+	+	+	+			+	+	+
	Thermocyclops hyalinus	MCC		+	+	+	+			+	+	+		+	+
	Daphnia cristata	MCF				+	+		+	+		+	+
	Diaphanosoma brachyurum	MCF	+	+	+		+	+	+	+	+	+	+	+	+
	Diaphanosoma leuchtenbergianum	MCF	+	+	+		+	+	+	+	+	+	+
	Leydigia leydigii	MCF		+										+
	Moina affinis	MCF	+	+			+		+		+
	Scapholeberis mucronata	MCF	+		+		+
	Apocyclops royi	MCF		+									+
	Cyclopoidea	MCF	+	+		+								+	+
	Eucyclops serrulatus	MCF	+		+	+	+	+	+	+	+	+	+
	Eucyclops speratus	MCF		+		+	+	+	+	+	+
	Eucyclops macrurus	MCF				+				+	+
	Eucyclops sp.	MCF		+		+				+	+
	Microcyclops varicans	MCF		+			+
	Pseudodiaptomus forbesi	MCF	+	+	+		+	+						+	+
	Schmackeria forbest	MCF	+	+	+	+	+		+	+	+	+	+	+	+
	Schmackeria inopinus	MCF	+	+						+		+	+
	Daphnia cucullata	LCF		+					+
	Daphnia pulex	LCF	+			+			+		+		+
	Daphnia longispina	LCF	+	+		+	+	+	+	+	+	+	+
	Daphnia hyalina	LCF	+	+		+	+	+	+	+	+	+	+	+	+
	Daphnia magna	LCF	+				+
	Sida crystallina	LCF			+	+		+	+		+	+	+
	Simocephalus vetulus	LCF		+	+	+	+	+	+				+
	Sinocalanus dorrii	LCF	+	+	+	+	+	+	+	+	+	+	+	+	+
	Sinodiaptomus sarsi	LCF		+							+
	Leptodora kindti	LCC	+	+			+		+	+	+	+			+
		Total	15	15	14	15	15	14	15	15	14	15	14	13	16
