# Supplementary material for: Distribution of Zooplankton Functional Groups in the Chaohu Lake Basin, China
Source: MDPI journal article supplement (doi:10.3390/w14132106), 2022-07-01
Supplement: s1 [file s1 › Table_S5.xlsx]

## Sheet: Table_S5
Table S5. Pearson correlation coefficients between zooplankton functional groups and environment factors.WT, water temperature; DO, dissolved oxygen; Cond, conductivity; Trans, transparency; TN, total nitrogen; TP, total nitrogen; COD, permanganate index; BOD5, biochemical oxygen demand after five days; Chla, chlorophyll a.
Zooplankton functional group	WT	DO	pH	Cond	Trans	TN	TP	PO4-P	NH4-N	NO3-N	NO2-N	COD	BOD5	Chla
LCC	0.146853	-0.0595454	0.0192072	0.014847	-0.122808	-0.103948	-0.068416	-0.0223642	-0.0763917	-0.103545	-0.0095664	-0.0525783	-0.125923	-0.0426418
LCF	0.0283204	-0.014143	0.0689104	-0.0177057	0.0730175	-0.160869	-0.13607	-0.108415	-0.106154	-0.201355	-0.0748963	-0.058396	-0.0900015	-0.0594089
MCC	0.231556	-0.0588066	-0.0746705	-0.212613	-0.0151131	-0.106658	-0.0924572	-0.0793497	-0.10635	-0.0234692	-0.0829353	-0.10617	-0.171089	-0.0366454
MCF	0.239017	-0.0835504	-0.18764	-0.148229	0.0319222	-0.0202756	-0.0527822	0.00505649	-0.0759227	0.0643794	0.0241817	-0.088909	-0.09575	-0.0481966
PA	0.116628	-0.0703631	0.01417	-0.0928402	-0.0525367	-0.142246	-0.0603652	-0.0618898	-0.0960028	-0.136248	-0.0666251	-0.0411648	-0.131042	-0.0296849
PA.PB	-0.00343648	-0.0135813	0.0679961	0.133749	-0.0771142	0.102084	0.00780153	0.0210994	0.0577618	0.11447	0.0860217	0.0704293	0.130747	-0.00190963
PA.PR	-0.148049	0.209732	0.0351646	-0.0161399	-0.0454865	-0.0734715	-0.0613394	-0.0592479	-0.0427596	-0.0607863	-0.0622338	-0.000900188	-0.0492783	0.00635326
PB	0.0240831	-0.0442925	0.0443232	0.117184	0.0388293	0.0586428	-0.0244173	-0.00859271	-0.00886573	0.0613698	0.034502	-0.0364973	-0.0321906	0.00219518
PF	-0.229209	-0.064439	0.0263185	-0.104145	0.178312	-0.0726751	-0.12326	-0.121313	-0.00617288	-0.0180948	-0.139517	-0.103766	-0.114281	-0.0307302
PR	-0.188606	-0.0166527	-0.0117173	0.0907882	-0.103171	0.109337	0.151215	0.0807488	0.198217	0.0258697	-0.00734137	0.0359809	0.192522	-0.00684796
RF	0.212597	0.0118743	0.127615	-0.0619712	-0.02544	-0.0754668	0.0396446	-0.0110135	-0.0917218	-0.164477	0.0521244	0.122502	0.0673998	0.0811357
RLG	-0.112711	0.106972	-0.184211	0.0425001	-0.04349	0.191112	-0.0355781	-0.00262927	0.0800774	0.206056	0.104504	0.0157091	0.147759	-0.0440776
RP	0.0631638	0.0320197	0.0294226	0.0692912	-0.0354938	-0.02257	-0.0179304	0.00824084	-0.0511184	-0.0462925	0.0803655	0.059653	0.00126505	-0.0152159
RS	0.364015	-0.144654	-0.0545197	-0.252702	-0.106975	-0.0855522	0.0924897	0.0439941	-0.0844467	-0.0949169	0.120077	0.0439014	0.11402	0.0338607
RSG	0.205899	-0.0835858	-0.152631	-0.0219462	-0.132304	0.0378736	0.0802484	0.102975	-0.0179412	0.057988	0.0547509	0.145533	0.146833	0.0196677
SCF	0.191378	-0.064696	0.268962	-0.263702	0.0589926	-0.120527	0.099373	-0.0991983	-0.116828	-0.27955	-0.10335	0.06737	0.131545	0.175724
