# Supplementary figures and images for: Distribution of Zooplankton Functional Groups in the Chaohu Lake Basin, China
Source: MDPI journal article supplement (doi:10.3390/w14132106), 2022-07-01

- Spring
- Summer
- Autumn
- Winter

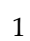

Supplement: s1 [file s1 › Figure S1.pdf]
